# Supplementary material for: The Predictive Value of Sepsis Scores for In-Hospital Mortality in Patients with Left-Sided Infective Endocarditis
Source: MDPI journal article supplement (doi:10.3390/tropicalmed9010023), 2024-01-16
Supplement: s1 [file s1]

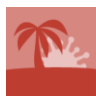

# Supplementary Materials: The Predictive Value of Sepsis Scores for In-Hospital Mortality in Patients with Left-Sided Infective Endocarditis

Bianca Leal de Almeida <sup>1,\*</sup>, Tania Mara Varejao Strabelli <sup>2</sup>, Marcio Sommer Bittencourt <sup>3,4</sup>, Vítor Falcão de Oliveira <sup>1</sup>, Danielle Menosi Gualandro <sup>2</sup>, Alfredo Jose Mansur <sup>2</sup>, Flavio Tarasouchi <sup>2</sup>, Lucas Pocebon <sup>1</sup>, Milena Paixão <sup>2</sup>, Flora Goldemberg <sup>1</sup>, Reinaldo Salomão <sup>5</sup> and Rinaldo Focaccia Siciliano <sup>1,2</sup>

Table S1. qSOFA e SOFA scores.

| System/Score                                                   | 0             | 1                    | 2                                           | 3                                                                    | 4                                                                       |
|----------------------------------------------------------------|---------------|----------------------|---------------------------------------------|----------------------------------------------------------------------|-------------------------------------------------------------------------|
| <b>SOFA</b>                                                    |               |                      |                                             |                                                                      |                                                                         |
| Respiration<br>PaO <sub>2</sub> /FIO <sub>2</sub> , mm Hg(kPa) | ≥400 (53.3)   | <400 (53.3)          | <300 (40)                                   | <200 (26.7) with<br>respiratory support                              | <100 (13.3) with<br>respiratory support                                 |
| Coagulation<br>Platelets, ×1000/μL                             | ≥150          | <150                 | <100                                        | <50                                                                  | <20                                                                     |
| Liver<br>Bilirubin, mg/dL<br>(μmol/L)                          | <1.2 (20)     | 1.2-1.9<br>(20-32)   | 2.0-5.9<br>(33-101)                         | 6.0-11.9 (102-204)                                                   | >12.0<br>(204)                                                          |
| Cardiovascular<br>MAP                                          | ≥70<br>mm Hg  | <70<br>mm Hg         | Dopamine <5 or<br>dobutamine (any<br>dose)* | Dopamine 5.1-15<br>or epinephrine ≤0.1<br>or norepinephrine<br>≤0.1* | Dopamine >15<br>or<br>epinephrine >0.1<br>or<br>norepinephrine<br>>0.1* |
| Central nervous system<br>(GCS)+                               | 15            | 14-13                | 12-10                                       | 9-6                                                                  | <6                                                                      |
| Renal<br>Creatinine, mg/dL(μmol/L)<br>/Urine output, mL/d      | <1.2<br>(110) | 1.2-1.9<br>(110-170) | 2.0-3.4 (171-299)                           | 3.5-4.9 (300-440)/ <500                                              | >5.0 (440)/<br><200                                                     |
| <b>qSOFA</b>                                                   |               |                      |                                             |                                                                      |                                                                         |
| Respiratory rate >22/min                                       |               |                      |                                             |                                                                      |                                                                         |
| Altered mentation                                              |               |                      |                                             |                                                                      |                                                                         |
| Systolic blood pressure<100mmHg                                |               |                      |                                             |                                                                      |                                                                         |

Consensus Definitions for Sepsis and Septic Shock, JAMA February 23, 2016 Volume 315, Number 8.

+ = Glasgow Coma Scale; \* = Catecholamine doses are given as μg/kg/min for at least 1 hour, MAP = mean arterial pressure

**Table S2.** Analysis and characteristics of patients with pre- existing Valve disease and no pre- existing valve disease.

| Characteristic/ Variables              | Pre- existing Valve disease<br>n= 435 (%) | Non Pre- existing Valve disease<br>n=82 (%) | OR    | 95%CI         | P value |
|----------------------------------------|-------------------------------------------|---------------------------------------------|-------|---------------|---------|
| <b>Baseline characteristics</b>        |                                           |                                             |       |               |         |
| Age (median; years)                    | 58(18- 87)                                | 52 (20-85)                                  | -     | -             | 0.033   |
| Male                                   | 275(63.2)                                 | 59 (72)                                     | 0.670 | 0.398 - 1.126 | 0.129   |
| Hypertension                           | 235(54)                                   | 35(42.7)                                    | 1.577 | 0.979 – 2.541 | 0.060   |
| <i>Diabetes mellitus</i>               | 79(18.2)                                  | 18(22)                                      | 0.780 | 0.443 – 1.404 | 0.420   |
| Chronic kidney disease                 | 52(12)                                    | 7(8.5)                                      | 0.789 | 0.443 – 1.404 | 0.037   |
| Hemodialysis                           | 20(4.6)                                   | 14(17.1)                                    | 0.234 | 0.112 – 0.485 | <0.001  |
| NYHA III/IV                            | 176(40.5)                                 | 30(36.6)                                    | 1.117 | 0.722 – 1.910 | 0.511   |
| qSOFA $\geq 2$ (n=392)                 | 33(8.4)                                   | 12(16.4)                                    | 0.467 | 0.228 – 0.954 | 0.033   |
| SOFA $\geq 2$ (n=392)                  | 135(34.4)                                 | 29(39.7)                                    | 0.797 | 0.477 - 1.331 | 0.385   |
| <i>S. aureus</i>                       | 34(7.8)                                   | 15(18.3)                                    | 0.378 | 0.195 – 0.733 | 0.003   |
| <i>Streptococcus group</i>             | 160(36.8)                                 | 26(31.7)                                    | 1.253 | 0.756 – 2.075 | 0.380   |
| <i>Enterococcus species</i>            | 44(10.1)                                  | 6(7.3)                                      | 1.425 | 0.586 – 3.462 | 0.432   |
| Culture positive                       | 347(79.8)                                 | 62(75.6)                                    | 1.272 | 0.729 – 2.217 | 0.395   |
| Embolism * (N=433)                     | 64(14.8)                                  | 32(39.5)                                    | 0.265 | 0.158 – 0.446 | <0.001  |
| Valve abscesses + (N=426)              | 51(12)                                    | 11(13.9)                                    | 0.840 | 0.417 – 1.694 | 0.627   |
| Death                                  | 120(27.6)                                 | 25(30.5)                                    | 0.868 | 0.518 – 1.453 | 0.592   |
| <b>Lab values at admission(median)</b> |                                           |                                             |       |               |         |
| Hemoglobin (g/dL) (n=427)              | 11 (4.5-20.6)                             | 9.9 (5-23.8)                                | -     | -             | <0.001  |
| Platelets (mg/L) (n=426)               | 191.000 (2.000-557.000)                   | 227.500 (123.000-481.000)                   | -     | -             | 0.033   |
| Leukocyte (mg/L) (n=427)               | 10.540 (11.000-40.470)                    | 9.600 (550- 42.000)                         | -     | -             | 0.356   |
| C-reactive protein (mg/L) (n=423)      | 89 (1.96-402)                             | 90 (6.24-389.2)                             | -     | -             | 0.259   |
| Creatinine (mg/dL) (n=426)             | 1.19 (0.45-13.1)                          | 1.31(0.63-15.54)                            | -     | -             | 0.176   |

Number (%); CI= confidence interval; OR= Odds ratio; NYHA= New York Heart Association classification; \*= suspect embolism in admission; += valve abscesses in the admission.

**Table S3.** qSOFA  $\geq 2$  and SOFA  $\geq 2$  accuracy for in-hospital mortality in endocarditis patients with and without pre-existing valve dis.ease

| Score                                      | Sensitivity<br>(95% CI) | Specificity<br>(95% CI) | PPV<br>(95% CI) | NPV<br>(95%CI) | LR +<br>(95% CI) |
|--------------------------------------------|-------------------------|-------------------------|-----------------|----------------|------------------|
| <b>With pre-existing valve disease.</b>    |                         |                         |                 |                |                  |
| qSOFA $\geq 2$                             | 17(11 – 25)             | 94(91 – 96)             | 53(38 – 68)     | 75(71 – 79)    | 3.1(1.78 – 5.68) |
| SOFA $\geq 2$                              | 55(46 – 63)             | 71(61 – 76)             | 41(34 – 49)     | 81(76 – 85)    | 1.9(1.51 – 2.43) |
| <b>Without pre-existing valve disease.</b> |                         |                         |                 |                |                  |
| qSOFA $\geq 2$                             | 41.7(24 – 61)           | 95(86 – 98)             | 83(55 – 95)     | 77(65 – 85)    | 10.1(2.45 – 43)  |
| SOFA $\geq 2$                              | 79(59 – 90)             | 79(64 – 85)             | 65(47 – 80)     | 88(76 – 95)    | 3.8(2.15 – 6.99) |

CI = confidence interval; PPV = positive predictive value; NPV = negative predictive value; LR+ = positive likelihood ratio
